# Supplementary material for: Asymmetric synthesis of novel polyhydroxylated derivatives of indolizidine and quinolizidine by intramolecular 1,3-dipolar cycloaddition of N-(3-alkenyl)nitrones
Source: Royal Society of Chemistry journal article supplement (doi:10.1039/b101057n), 2001-01-01
Supplement: b101057n.doc [file b101057n.doc]

Supplementary materials to communication:

Asymmetric synthesis of novel polyhydroxylated derivatives of indolizidine and quinolizidine by intramolecular 1,3-dipolar cycloaddition of *N*-(3-alkenyl)nitrones

# Piotr Gębarowski and Wojciech Sas*

Warsaw University of Technology, Faculty of Chemistry, ul. Noakowskiego 3, 00 664 Warszawa, Poland

E-mail: sas@ch.pw.edu.pl

# Configuration assignment of the adduct 4

The intramolecular 1,3-dipolar cycloaddition reaction of N-(3-alkenyl)nitrones gives 7-oxa-1-azabicyclo[2.2.1]heptane derivatives, in which substituent at the 6 carbon occupies *exo* position.3, 4 However, in the case of the nitrone **3** it is possible formation of two such adducts: **4** and **4’** (Figure 1).

Figure 1

The molecular modelling examination, AM1 calculation (Fig. 2), shown that, for the adduct **4**, the lowest energy minimum corresponds to that conformation, in which H6 and H4’ are antiperiplanar (Fig. 2a, conformation in frame). The both gauche conformation are higher in energy by 3.30 and 4.48 kcal/mol, respectively, than the antiperiplanar one.In contrast, for the derivative **4’** the lowest energy corresponds to the conformation, in which H6-H4’ are gauche (Fig. 2b, conformation in frame).

Figure 2

Thus the molecular modelling results are consistent with 1H NMR data only for the stereoisomer **4.**

## Experimental

(1R,2R,3S,8R,9aR)-1,2,3,8-Tetrahydroxyquinolizidine **6**: A solution of **4** (0.30 g, 0.8 mmol) in 5% HClaq (8,5 cm3) was kept at room temperature for 2 days, then neutralised with KOH (0.7 g), saturated with NaCl and extracted with CH2Cl2. Derivative **5** (0.26 g, 96%) was obtained as white powder. This, without purification, was dissolved in MeOH (13 cm3) and hydrogenated in the presence of Raney-Ni, under 10 bars at 75 – 80 oC for 21 h. A chromatography purification (silica gel, acetone - MeOH, 5:1, v/v) furnished **6** (0.12 g, 73%) as white crystals, mp 92 – 93 oC; H (500 MHz, D2O): O.99 (s, 3H, CH3), 1.02 (q, J 12.2 Hz, 1H, H9a), 1.15 (s,3H, CH3), 1.31 (dd, J 12.6, 11.8 Hz, 1H, H7a), 1.78 (ddd, J 12.6, 4.3, 2.6 Hz, 1H, H7e), 2.03 (dd, J 11.4, 10.7 Hz, H4a), 2.35 (m, 2H, H9e, H(9a)), 3.06 (t, J 9.3 Hz, 1H, H1), 3.09(dd, J 11.4 Hz, 4.7 Hz, 1H, H4e), 3.17 (t, J 9.3 Hz, 1H, H2), 3.47 (ddd, J 10.7 Hz, 9.3 Hz, 4.7 Hz, 1H, H3), 3.84 (tt, J 11.7 Hz, 4.3 Hz, 1H, H8a); c (50 MHz, D2O): 16.87, 29.11, 38.19, 47.63, 49.92, 56.55, 59.01, 64.78, 69.89, 75.86, 78.23;  cm-1: 3420, 3324, 2972, 2924, 1660, 1476, 1380, 1348; HRMS m/z calc. for C11H22NO4 (M+H+) 232.1548, found 232.1543; +7.6 (c 0.5, H2O).

¶ (1R,2R,7R,8aR)-1,2,3,7-Trihydroxyindolizidine **8**: A solution of crude **5** (0.26 g, 0.78 mmol) in MeOH (7cm3) was cooled to –5 – 0 oC and a solution of NaIO4 (0.20 g, 0.93 mmol) in water was added dropwise. The mixture was stirred for 2 h then the reaction was quenched with ethylene glycol (0.05 cm3). A routine work-up afforded crude **7** (0.24 g), which without purification was hydrogenated in MeOH (8cm3) in the presence of a Raney-Ni, under 10 bars at ambient temperature for 24 h and then at 45 oC for 24 h. A chromatography purification (silica gel, chloroform - MeOH, 4:1→2:1, v/v) furnished **8** (0.09 g, 57%) as yellowish syrup; H (500 MHz, D2O): 1.06 (s, 3H, CH3), 1.16 (s, 3H, CH3), 1.27 (ddd, J 12.0, 11.8, 11.5, Hz, 1H, H8a), 1.38 (dd, J 12.8, 11.6 Hz, 1H, H6a), 1.87 (ddd, J 12.8, 4.4, 2.0 Hz, 1H, H6e), 2.26 (m, 1H, H8e), 2.66 (‘bt’, J 9.1 Hz, 1H, H(8a)), 2.78 (dd, J 11.3, 2.8 Hz, 1H, H3), 3.07 (bdd, J 11.3, 8.4 Hz, 1H, H3), 3.73 (dd, J 8.4, 4.7 Hz, 1H, H1), 3.94 (tt, J 11.5, 4.6 Hz, 1H, H7), 4.12 (ddd, J 8.4, 4.7, 2.8, 1H, H2); c (50 MHz, D2O): 16.24, 28.66, 37.29, 46.60, 51.69, 61.46, 66. 17, 76.16, 82.67;  cm-1: 3332, 2968, 2963, 1660, 1460, 1368; HRMS m/z calc. for C10H20NO3 (M+H+) 202.1438, found 202.1444; - 17.14 (c 1.0, MeOH).

**References**

A. Budzińska and W. Sas, Tetrahedron, 2000, **57**, 2021.

4 WOppolzer, S. Siles, R. L. Snowden, B. H Bakker and M. Petrzilka, Tetrahedron, 1985, **41**, 3497; P. G. M. Wuts, Y.-W. Jung, J. Org. Chem.,1988, **53**, 1957; B. H. Norman, Y. Gareau, A. Padwa, J. Org. Chem,. 1991, **56**, 2154.
